# Supplementary material for: Observational UK cohort study to describe intermittent oral corticosteroid prescribing patterns and their association with adverse outcomes in asthma
Source: HighWire-hosted journal article supplement (doi:10.1136/thorax-2022-219642), 2022-12-27
Supplement: thorax-2022-219642supp001_data_supplement.pdf [file thorax-2022-219642supp001_data_supplement.pdf]

## Supplementary materials

**Table S1. The disease onset definitions of the adverse outcomes analysed in this study in UK patients with asthma**

| <b>Adverse outcome</b>                               | <b>Definition</b>                                                                                                                                                                                                                                                                                                                                                                                              |
|------------------------------------------------------|----------------------------------------------------------------------------------------------------------------------------------------------------------------------------------------------------------------------------------------------------------------------------------------------------------------------------------------------------------------------------------------------------------------|
| <b>Dyslipidaemia</b>                                 | Total cholesterol readings >6.5 mmol/L in outcome period and/or low-density lipoprotein readings >4 mmol/L in outcome period and/or triglycerides readings $\geq$ 2.3 mmol/L in outcome period and/or diagnostic code for dyslipidaemia or hyperlipidaemia or hypercholesterolaemia or hypertriglyceridaemia                                                                                                   |
| <b>Behavioural disorders (adolescent population)</b> | Diagnostic code in outcome period was determined by steering committee (Read codes)                                                                                                                                                                                                                                                                                                                            |
| <b>Renal impairment</b>                              | Chronic kidney disease diagnostic code (only stages 3a, 3b, 4 or 5 were considered) and/or estimated glomerular filtration rate <60 mL/min/1.73m <sup>2</sup> in outcome period (Read codes) and/or dialysis code in the outcome period (Read codes) and/or renal transplant code in the outcome period (Read codes)                                                                                           |
| <b>Osteoporosis/osteoporotic fracture</b>            | Osteoporosis diagnostic code in outcome period (Read codes) and/or osteoporotic fractures (hip, wrist or spinal fracture types only were considered).<br>A recurring fracture of the same site within 8 weeks of the previous fracture date was counted as the same fracture. However, the patient was still considered at risk of a fracture at a different site any time after the date of previous fracture |
| <b>Hypertension</b>                                  | Hypertension diagnostic code in outcome period (Read codes)                                                                                                                                                                                                                                                                                                                                                    |
| <b>Peptic ulcer</b>                                  | Peptic ulcer disease diagnostic code (with endoscopy code for gastric ulcer and duodenal ulcer) in outcome period (Read codes)                                                                                                                                                                                                                                                                                 |
| <b>Cardiovascular disease</b>                        | Cardiovascular disease diagnostic code for myocardial infarction, heart failure or stroke in outcome period (Read codes)                                                                                                                                                                                                                                                                                       |
| <b>Depression/Anxiety</b>                            | Depression/anxiety diagnostic code in outcome period (Read codes) or depression/anxiety diagnostic code in outcome period and antidepressant medications in the outcome period                                                                                                                                                                                                                                 |
| <b>Sleep disorders</b>                               | Sleep disorder diagnostic code in outcome period (Read codes) and/or sleep disorder diagnostic code and hypnotic medications in the outcome period (Read codes), excluding sleep apnoea                                                                                                                                                                                                                        |
| <b>Cataracts</b>                                     | Cataract diagnostic code in outcome period (Read codes) and/or cataract surgery                                                                                                                                                                                                                                                                                                                                |
| <b>Glaucoma</b>                                      | Glaucoma diagnostic code in outcome period (Read codes) and/or treatment for Glaucoma in the outcome period                                                                                                                                                                                                                                                                                                    |
| <b>Type 2 diabetes mellitus</b>                      | Diagnosis of type 2 diabetes mellitus (Read code post-index date) and/or antidiabetic medication prescriptions in outcome period and/or HbA1c $\geq$ 6.5% in outcome period (Read code post index date)                                                                                                                                                                                                        |

|                     |                                                                                                                                                                             |
|---------------------|-----------------------------------------------------------------------------------------------------------------------------------------------------------------------------|
| <b>Pneumonia</b>    | Pneumonia diagnostic code in outcome period (Read codes). A recurring diagnosis of pneumonia within 4 weeks of prior diagnosis was considered as the same event             |
| <b>Sleep apnoea</b> | Sleep apnoea diagnostic code in outcome period (Read codes) and/or referral to sleep clinic in the outcome period and usage of a continuous positive airway pressure device |
| <b>Weight gain</b>  | Increase in Body Mass Index by at least 1 kg/m <sup>2</sup> compared to index date in adults and more than 1% centile band                                                  |

**Figure S1. Distributions of SABA (A) and ICS (B) prescriptions in the 12 months prior to initial OCS prescription in UK patients with asthma (OCS cohort)**

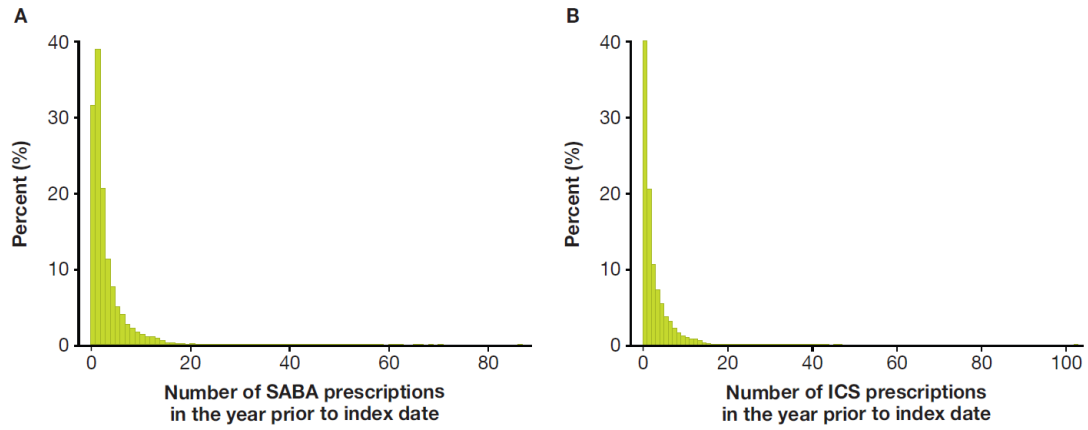

ICS, inhaled corticosteroid; OCS, oral corticosteroid; SABA, short-acting  $\beta_2$  agonist.

**Figure S2. Patterns of intermittent OCS use and adverse outcomes by years in UK patients with asthma using Kaplan-Meier survival estimates**

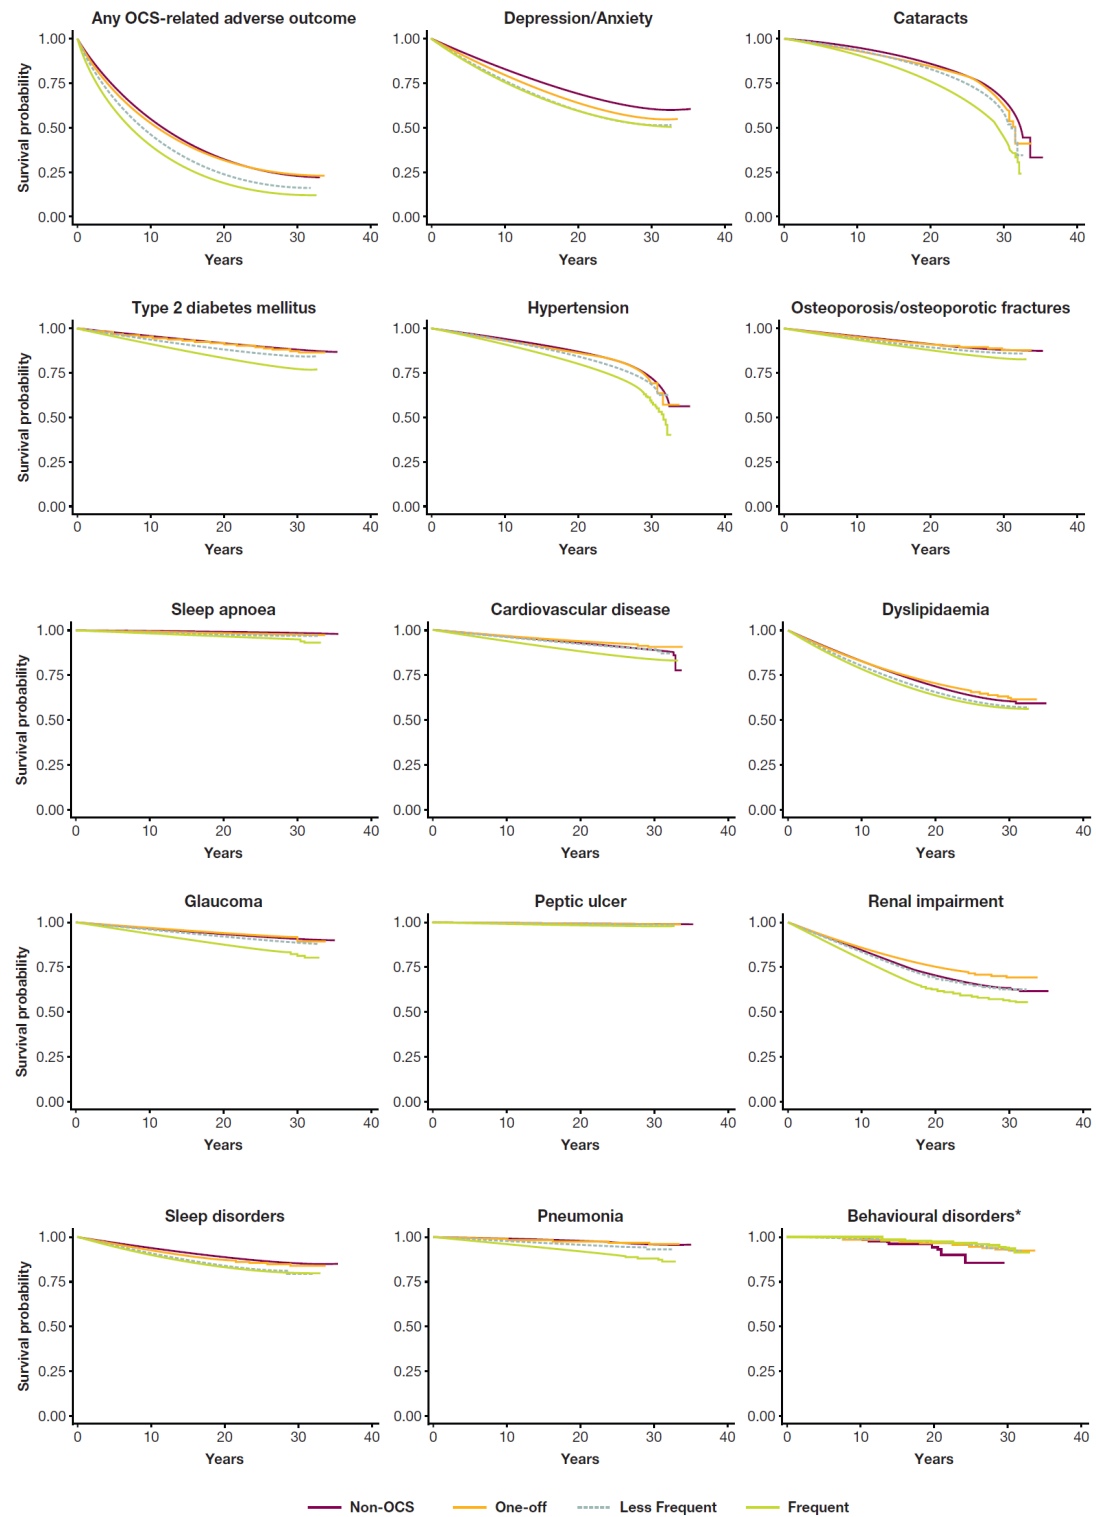

**OCS**, oral corticosteroid.

\*Behavioural disorders include diagnoses: Distress, agitation, nervousness, emotional problems, irritable, and abnormal behaviour.

Fixed Analysis was adjusted for age, gender, body mass index and smoking.
